# Supplementary material for: Role of IL-10-producing regulatory B cells in modulating T-helper cell immune responses during silica-induced lung inflammation and fibrosis
Source: PubMed Central journal article supplement (PMC4926212; doi:10.1038/srep28911), 2016-06-29
Supplement: srep28911-s1.pdf [file srep28911-s1.pdf]

**Role of IL-10-producing regulatory B cells in modulating T-helper cell immune responses during silica-induced lung inflammation and fibrosis**

Fangwei Liu<sup>1</sup>, Wujing Dai<sup>1</sup>, Chao Li<sup>1</sup>, Xiaowei Lu<sup>1</sup>, Ying Chen<sup>1</sup>, Dong Weng<sup>2</sup>, Jie Chen<sup>1\*</sup>

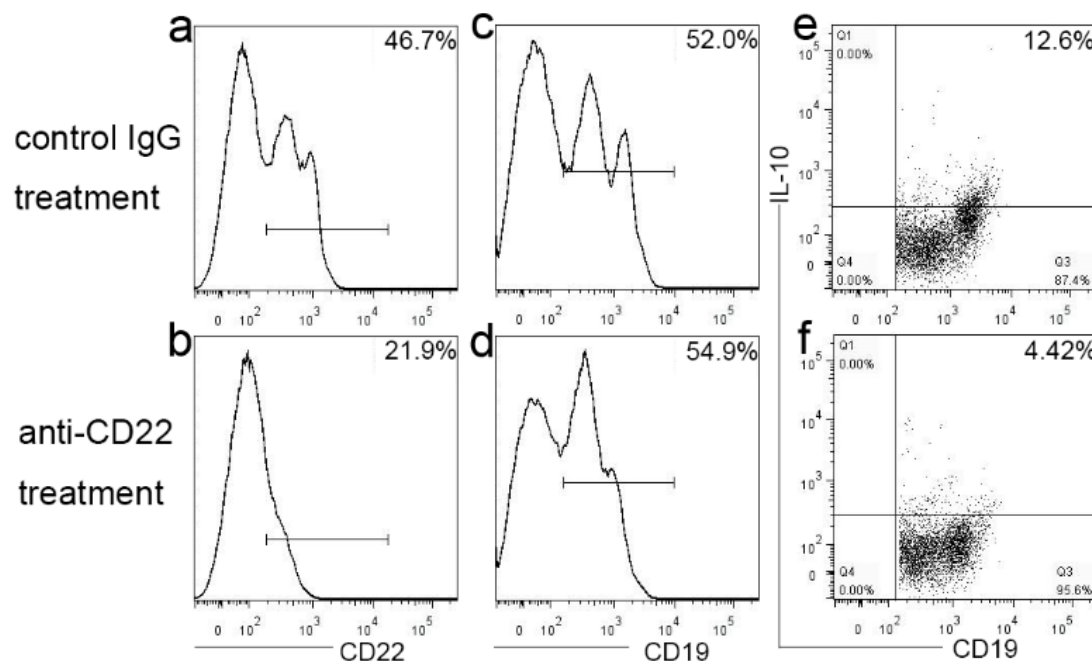

**Figure S1. Effect of anti-CD22 treatment on different subsets in spleen.** Cells from mice treated with anti-CD22 antibody (b, d, f) and cells from mice treated with control IgG antibody (a, c, e) were stained with anti-CD22, anti-CD19 and anti-IL-10 fluorescent antibodies at day7 after silica instillation. (a, b) The percentage of CD22<sup>+</sup> subset was decreased obviously by anti-CD22 treatment. (c, d) The percentage of CD19<sup>+</sup> subset was not decreased after anti-CD22 treatment. (e, f) The percentage of CD19<sup>+</sup>IL-10<sup>+</sup> subset was decreased by anti-CD22 treatment after silica instillation.

**Table S1. Effect of anti-CD22 treatment on the development of silicotic nodules in mice lung**

| Groups           | 7 days after instillation |       | 28 days after instillation |                     | 56 days after instillation |                       |
|------------------|---------------------------|-------|----------------------------|---------------------|----------------------------|-----------------------|
|                  | silicotic nodule          |       | silicotic nodule           |                     | silicotic nodule           |                       |
|                  | n                         | grade | n                          | grade               | n                          | grade                 |
| saline           | 5                         | 0     | 5                          | 0                   | 5                          | 0                     |
| saline+anti-CD22 | 5                         | 0     | 5                          | 0                   | 5                          | 0                     |
| silica           | 5                         | I     | 5                          | I <sup>+</sup> - II | 5                          | II <sup>+</sup> - III |
| silica+anti-CD22 | 5                         | I     | 5                          | I - I <sup>+</sup>  | 5                          | I - II                |
